# Supplementary material for: Generation of a more efficient prime editor 2 by addition of the Rad51 DNA-binding domain
Source: PubMed Central journal article supplement (PMC8460726; doi:10.1038/s41467-021-25928-2), 2021-09-23
Supplement: 41467_2021_25928_MOESM1_ESM.pdf [file 41467_2021_25928_MOESM1_ESM.pdf]

## Supplementary Information

### **Generation of a more efficient prime editor 2 by addition of the Rad51 DNA-binding domain**

Contents:

Supplementary Figures 1 – 5

Supplementary Tables 1 – 4

Supplementary Note

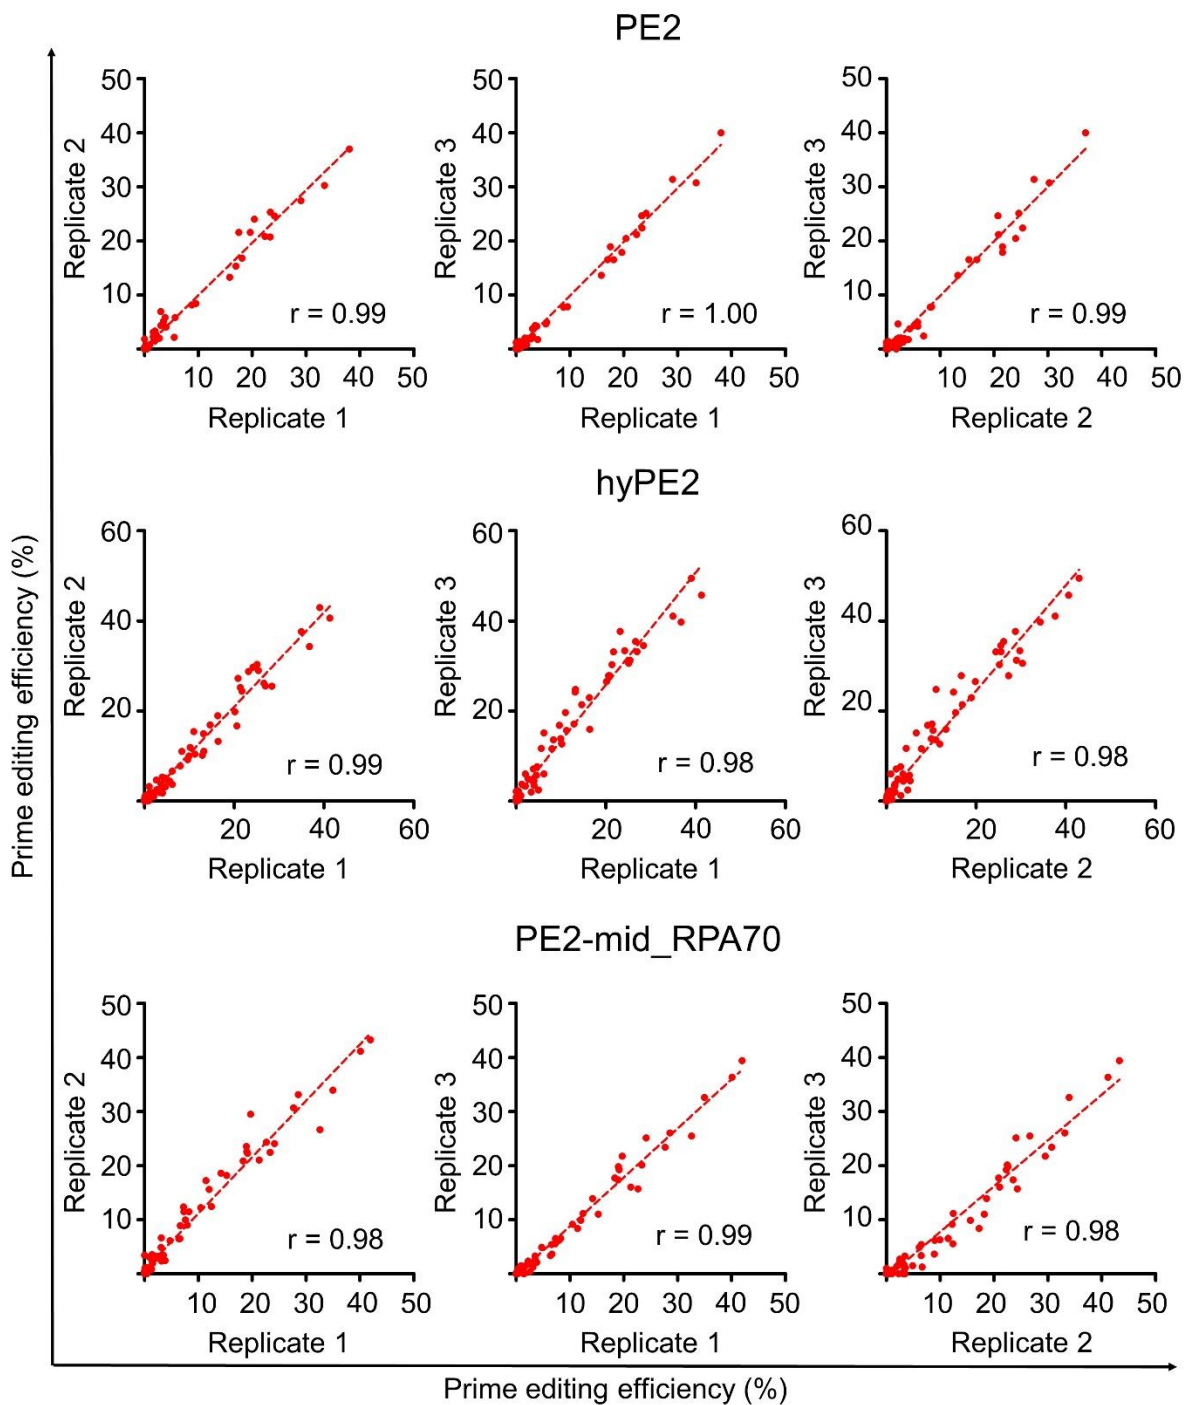

**Supplementary Figure 1.** Correlations between prime editing efficiencies from biological replicates for high-throughput evaluations of prime editing activities. The biological replicates were independently cultured, transfected with plasmids encoding prime editor 2 (variants), and analyzed. The Pearson correlation coefficients ( $r$ ) and trend lines are shown. The number of analyzed target sequences  $n = 83$ . Source data are provided as a Source Data file.

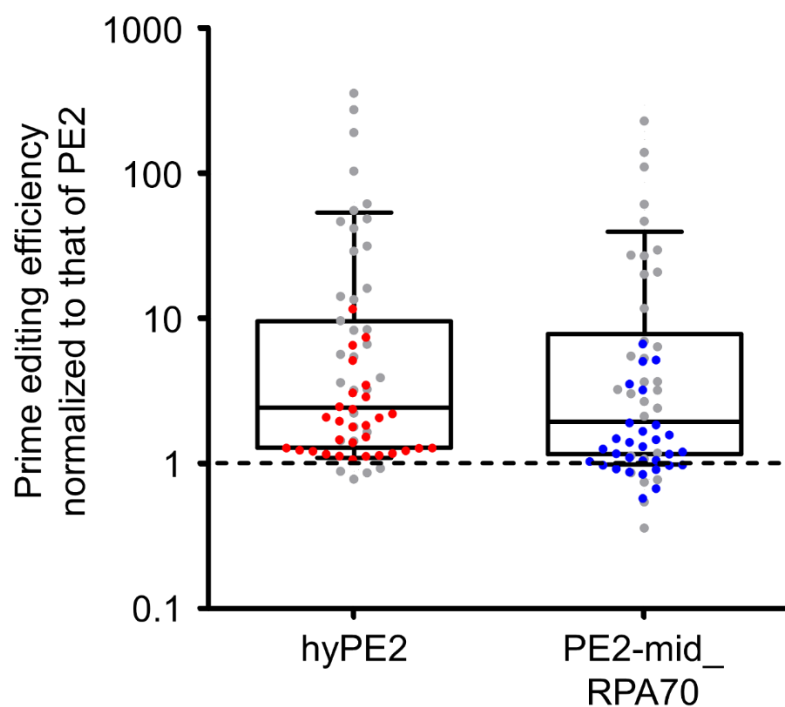

**Supplementary Figure 2.** Prime editing efficiencies of PE2 variants normalized to the efficiency of PE2 at the same target sequences, which had been lentivirally integrated in HEK293T cells. Target sequences with PE2-induced prime editing efficiencies less than 1% are shown as gray dots. The number of target sequences  $n = 64$ . Data of minimum to maximum values are presented. For the boxes, the top, middle, and bottom lines represent the 25th, 50th, and 75th percentiles, respectively. The whiskers indicate the 10th and 90th percentile values. Source data are provided as a Source Data file.

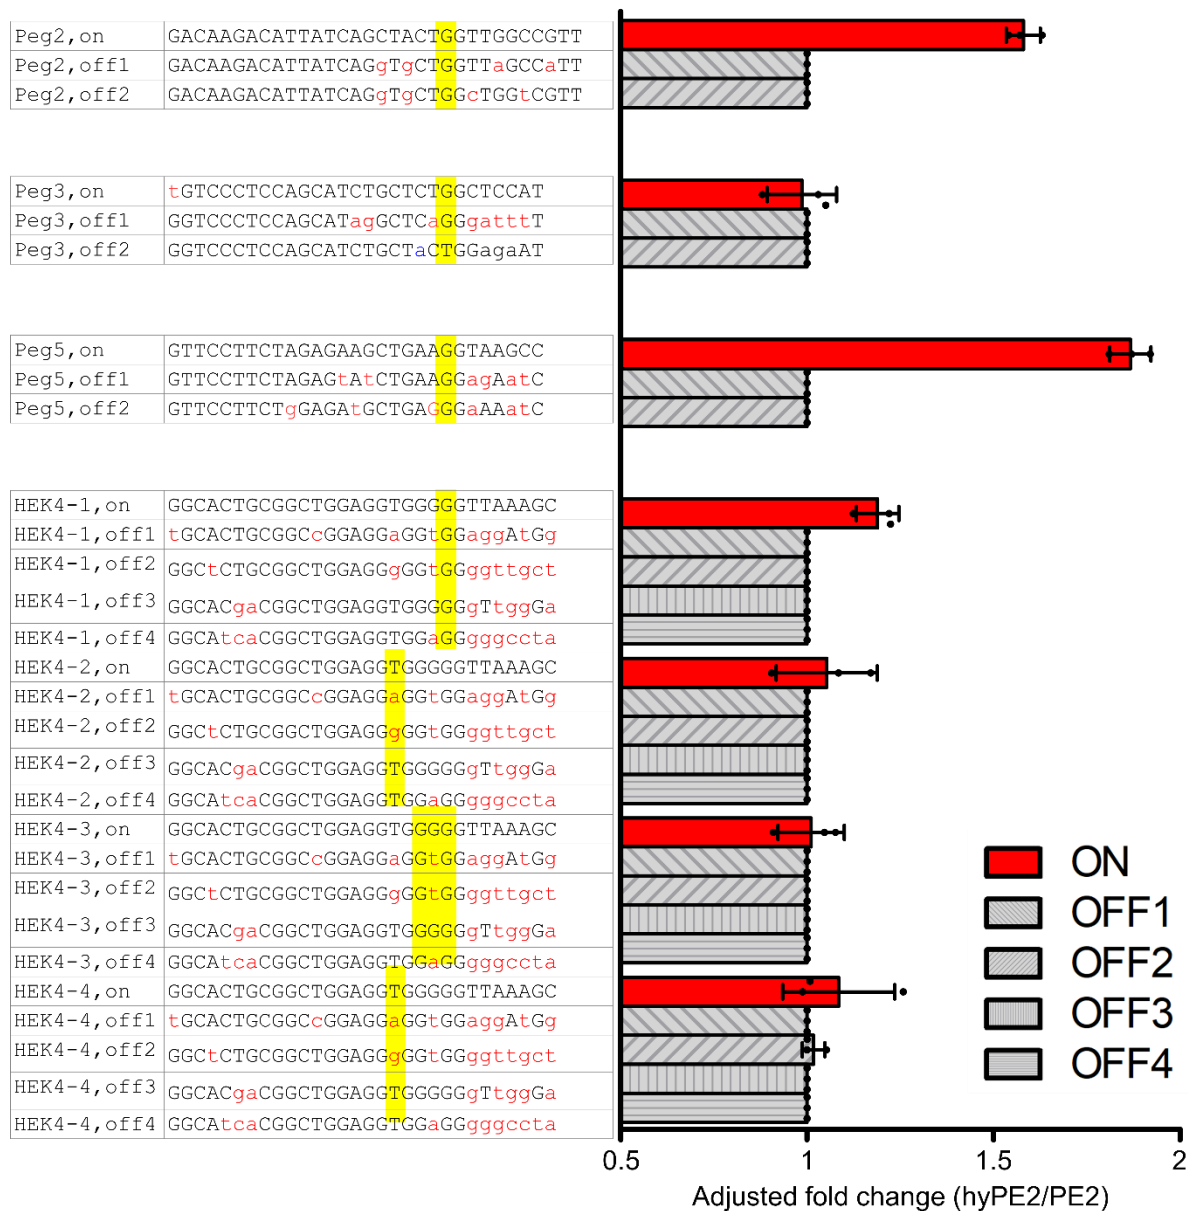

**Supplementary Figure 3.** Off-target effects of hyPE2 and PE2 at the potential off-target sites for pegRNAs 2, 3, and 5 and for four different pegRNAs targeting HEK4 in HEK293T cells. The intended editing positions are highlighted in yellow; mismatched and bulged nucleotides are indicated in red and blue lower-case fonts, respectively. Data points are overlaid. Data are means  $\pm$  S.D. for three independent biological replicates. on, on-target site; off, off-target site. Source data are provided as a Source Data file.

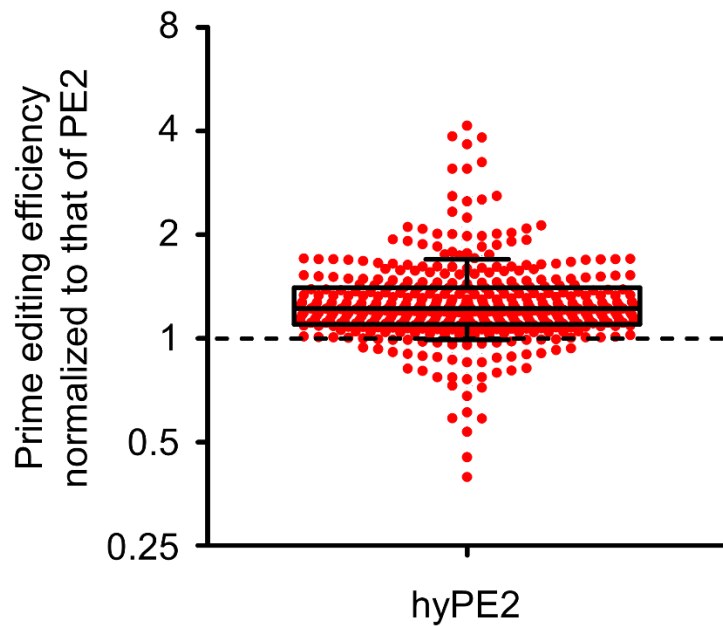

**Supplementary Figure 4.** Prime editing efficiencies of PE2 variants normalized to the efficiency of PE2 at the same target sequences, which had been lentivirally integrated in HEK293T cells. The number of target sequences  $n = 423$ . PegRNAs that resulted in PE2-directed prime editing efficiencies higher than 1% are shown. Data of minimum to maximum values are presented. For the boxes, the top, middle, and bottom lines represent the 25th, 50th, and 75th percentiles, respectively. The whiskers indicate the 10th and 90th percentile values. Source data are provided as a Source Data file.

a

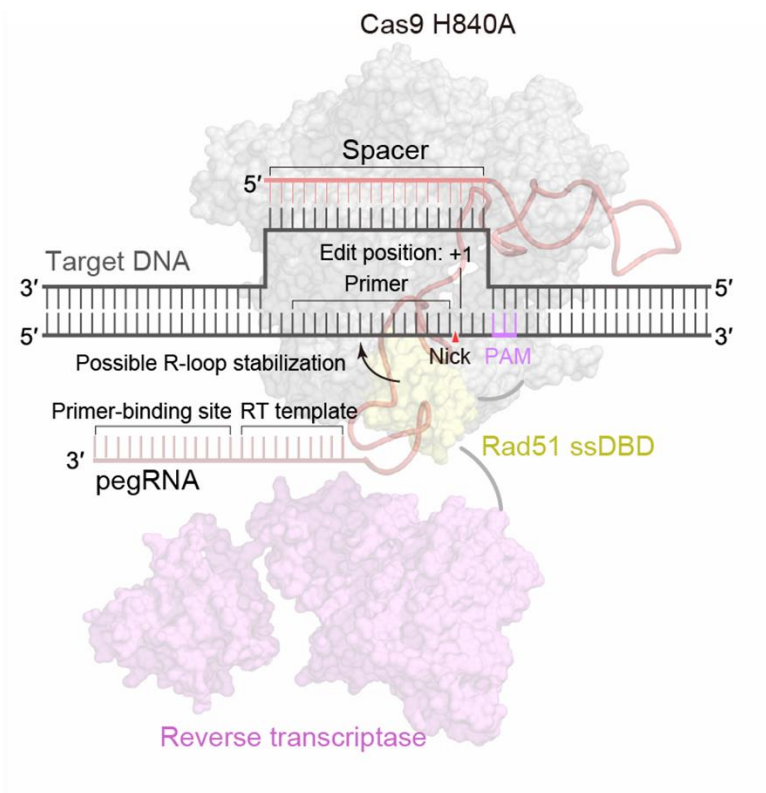

b

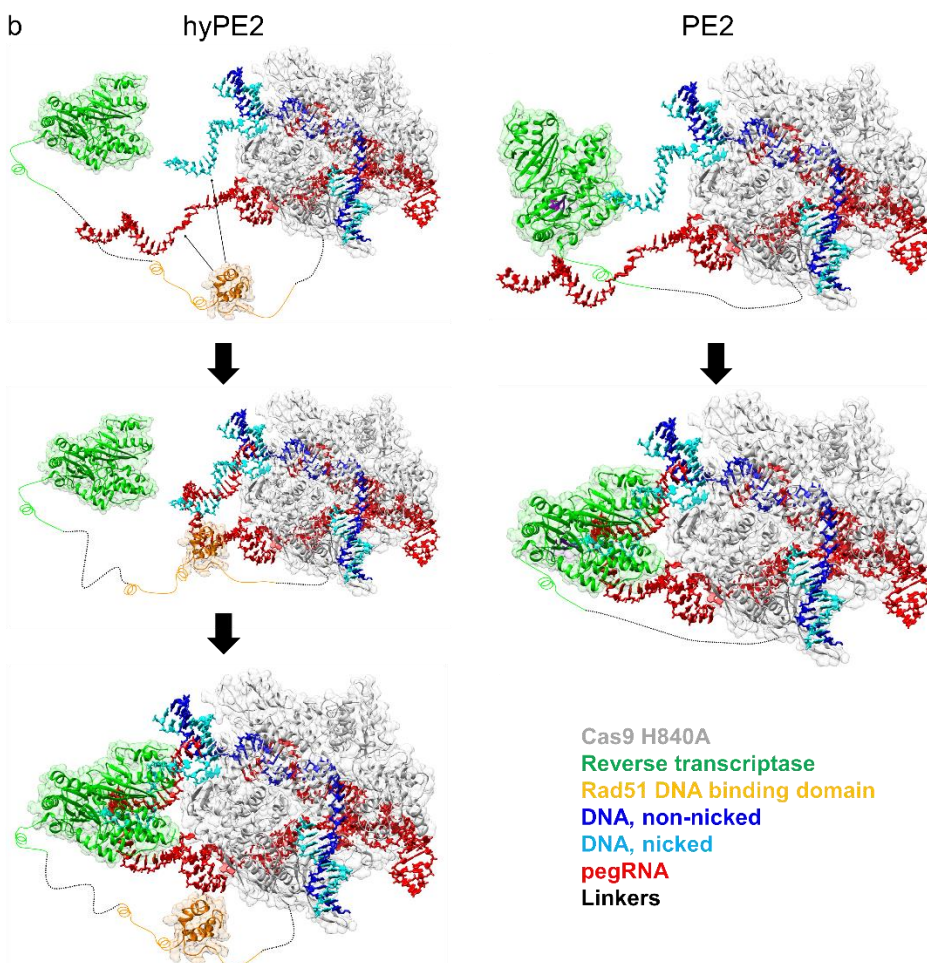

**Supplementary Figure 5.** Structure of hyPE2. **a**, Schematic representation of hyPE2. **b**, Three-dimensional structures predicted for hyPE2 (left) and PE2 (right) before and after binding of the reverse transcriptase domain to the nicked target ssDNA/pegRNA hybrid. Modeling of a hypothetical interaction between Rad51, the nicked target ssDNA, and the pegRNA primer binding site is shown for hyPE2. Gray, Cas9 H840A; Green, Reverse transcriptase; Yellow, Rad51 DNA binding domain; Blue, DNA, non-nicked; Light blue, DNA, nicked; Red, pegRNA; Black, Linkers.

**Supplementary Table 1.** Characteristics (sequences of target, pegRNA spacer, and extension) of pegRNAs used in this study and relevant editing efficiencies (provided as a separate file).

**Supplementary Table 2.** Information about endogenous target sites and associated potential off-target sites (provided as a separate file). Mismatched and bulged nucleotides in the off-target sites are indicated in red and blue lower-case fonts, respectively. Mismatched nucleotides at the 5' end of target sequences that are 20-nt away from the PAM were not counted as mismatches.

**Supplementary Table 3.** Training and test datasets used for the development of PEselector (provided as a separate file).

**Supplementary Table 4.** Oligonucleotides used in this study (provided as a separate file).



## Supplementary Note

### PE2 (addgene # 132775)

NLS

Cas9 H840A

Linker A

Reverse transcriptase

atgaaacggacagccgacggaagcgagttcgagtcaccaaagaagaagcggaaagtcgacaagaagtacagc  
atcggcctggacatcggcaccaactctgtgggctgggcccgtgatcaccgacgagtacaagggtcccagcaagaaa  
ttcaaggctgtgggcaacaccgaccggcacagcatcaagaagaacctgatcggagccctgctgttcgacagcggc  
gaaacagccgaggccaccggctgaagagaaccgcccagaagaagatacaccgacggaagaaccggatctg  
ctatctgcaagagatcttcagcaacgagatggccaagggtggacgacagcttctccacagactggaagagtccttct  
gggtggaagaggataagaagcagcagcggcaccatctcggcaacatcgtggacgaggtggcctaccacgaga  
agtacccaccatctaccactgagaaagaaactgggtggacagcaccgacaaggccgacctgaggctgatctatct  
ggccctggcccatgatcaagttccggggccacttctgatcagggcgacctgaacccccgacaacagcgcagt  
ggacaagctgttcatccagctggtgcagacctacaaccagctgttcgaggaaaacccatcaacgccagcggcgtg  
gacgccaaggccatctgtctgccagactgagcaagagcagcggctggaaaatctgatcggccagctgcccggc  
gagaagaagaatggcctgttcggaaacctgattgccctgagcctggcctgacccccaaactcaagagcaactcg  
acctggccgaggatgccaactgcagctgagcaaggacacctacgacgacacctggacaacctgctggccag  
atcggcgaccagtacgccacctgttctggccgcaagaacctgtccgacgccatctctgtagcgacatcctgag  
agtgaacaccgagatcaccaggccccctgagcgcctctatgatcaagagatacagcagcaccaccaggacc  
tgacctgtgaaagctctcgtgcggcagcagctgcctgagaagtacaaagagatttctcgaccagagcaagaac  
ggctacgccggctacattgacggcggagccagccaggaagagttctacaagttcatcaagccatctctgaaaag  
atggacggcaccgaggaactgctcgtgaagctgaacagagaggacctgctgcggaagcagcggaccttcgacaa  
cggcagcatccccaccagatccacctgggagagctgcacgccattctgcggcggcaggaagattttaccattcc  
tgaaggacaaccgggaaaagatcgagaagatcctgacctccgcatcccctactacgtggccctctggccaggg  
gaaacagcagattcgctggatgaccagaaagagcgaggaaacctcaccctggaacttcgaggaagtgtgtg  
gacaagggcgttccgcccagagcttcatcgagcggatgaccaacttcgataagaacctgccaacgagaagggtg  
ctgccaagcacagcctgctgtacgagtactcaccgtgtataacgagctgaccaaagtgaatacgtgaccgagg  
gaatgagaaagcccgcctcctgagcggcgagcagaaaaaggccatcgtggacctgctgttcaagaccaaccgg  
aaagtgacctgaagcagctgaaagaggactactcaagaaaatcgagtgttcgactcctgtgaaatctccggcg  
tgaagatcggttcaacgcctccctgggcacataaccagatctgctgaaaattatcaaggacaaggacttctggac  
aatgaggaaaacgaggacattctggaagatatcgtgctgacctgacactgtttgaggacagagagatgatcgagg  
aacggctgaaaacctatgccacctgttcgacgacaaaagtgatgaagcagctgaagcggcggagatacaccggct  
ggggcaggctgagccggaagctgatcaacggcatccgggacaagcagtcgggcaagacaatcctggatttctga  
agtccgacggcttcgccaacagaaacttcatgcagctgatccacgacgacagcctgacctttaaagaggacatcca  
gaaagcccagggttccggccagggcgatagcctgcagcagcattgccaatctggccggcagccccgccattaa  
gaagggcatcctgcagacagtgaagggtgtggacgagctcgtgaaagtgatggccggcacaagcccagagaac  
atcgtgatcgaaatggccagagagaaccagaccaccagaaggacagagaacagccgcgagagaatgaa  
gcggatcgaagaggcatcaaagagctgggcagccagatcctgaaagaacacccccgtggaaaacaccagctg  
cagaacgagaagctgtacctgtactacctgcagaatgggcccggatgtacgtggaccaggaactggacatcaac  
cggctgtccgactacgatgtggacgctatcgtgcctcagagcttctgaaggacgactccatcgacaacaagggtgctg  
accagaagcgacaagaaccggggcaagagcgacaacgtgccctccgaagaggctcgtgaagaagatgaagaa  
ctactggcggcagctgctgaacccaagctgattaccagagaaagttcgacaatctgaccaaggccgagagagg  
cggcctgagcgaactggataaggccggcttcatcaagagacagctggtggaaacccggcagatcacaagcagc

tggcacagatcctggactcccggatgaactaagtagcagcagagaatgacaagctgatccgggaagtgaagtgat  
tcaccctgaagtccaagctggtgctccgattccggaaggattccagtttacaagtgccgagatcaacaactacca  
ccacgcccacgacgcctacctgaacgcccgtggtggaaccgcccgatcaaaaagtaccctaaagctggaaagcg  
agttcgtgtacggcgactacaaggtgtacgacgtgcggaagatgatcgccaagagcagcaggaatcggaag  
gctaccgccaagtacttctctacagcaacatcatgaacttttcaagaccgagattaccctggccaacggcgagatcc  
ggaagcggcctctgatcgagacaaacggcgaaaccggggagatcgtgtgggataagggccgggattttgccacc  
gtgcggaagtgctgagcatgccccaaagtgaatatcgtgaaaaagaccgaggtgcagacaggcggcctcagcaa  
agagtctatcctgccaagaggaacagcagataagctgatcgccagaaagaaggactgggaccctaagaagtacg  
gcggtctgacagccccaccgtggcctattctgtgctgggtggccaaagtggaaaagggaagccaagaaact  
gaagagtgtgaaagagctgctgggatcacatcatggaagaagcagcttcgagaagaatcccatcgactttctg  
gaagccaagggctacaaagaagtgaaaaggacctgatcatcaagctgcctaagtactccctgttcgagctgga  
aacggccggaagagaatgctggcctctgccggcgaactgcagaagggaacgaactggccctgccctccaaata  
tgtgaacttctgtacctggccagccactatgagaagctgaagggtcccccgaggataatgagcagaaacagctgt  
ttgtggaacagcacaagcactacctggacgagatcatcgagcagatcagcaggttctccaagagagtatcctggc  
cgacgctaacttgacaaaagtgtctgccgctacaacaagcaccgggataagcccatcagagagcaggccgaga  
atatcatccacctgtttaccctgaccaatctgggagcccctgccgcttaagtaactttgacaccacctcagccgaa  
gaggtacaccagcaccaaagaggtgctggacgccaccctgatccaccagagcatcaccggcctgtacgagacac  
ggatcgacctgtctcagctgggaggtgactctggaggatctagcggaggatcctctggcagcagacaccaggaac  
aagcagctcagcaacaccagagagcagtgccggcagcagcggcggcagcagcaccctaaatagaaagtga  
gtatcggctacatgagacctcaaaagagccagatgtttctctaggggtccacatggctgtctgattttctcaggcctggg  
cggaaaccgggggcatgggactggcagttcgccaagctcctctgatcatacctctgaaagcaacctctacccccgtg  
tcataaaacaataccccatgtcacaagaagccagactggggatcaagccccacatacagagactgttgaccag  
ggaatactggtaccctgccagtccccctggaacacgcccctgctaccctgtaagaaccagggactaatgattatag  
gacctgtccaggatctgagagaagtcaacaagcgggtggaagacatccaccaccctgcccacaccttacaacct  
ctgagcgggctcccaccgtcccaccagtgtacactgtgctgattaaaggatgccttttctgctgagactccacc  
caccagtacacctctctgcctttgagtggagagatccagagatgggaaatcaggacaattgacctggaccagact  
cccacagggttcaaaaacagctcccaccctgttaatgaggcactgcacagagacctagcagactccggatccagc  
accagacttgatcctgctacagtacgtggatgacttactgctggccgcaacttctgagctagactgccaacaaggtac  
tcgggcccctgttacaaccctagggaaacctcgggtatcgggcccctcggccaagaaagcccaattgcccagaaaca  
ggtaagatctggggtatcttctaaaagaggggtcagagatggctgactgaggccagaaaagagactgtgatgggg  
cagcctactccgaagaccctcgacaactaaggagttcctagggaaaggcaggctctgtgcctctcatccctggg  
ttgacagaaatggcagccccctgtaccctctcaccaaaccggggactctgtttaattggggcccagaccaaaaa  
ggcctatcaagaaatcaagcaagctcttctaactgcccagcccctggggtgcccagattgactaagcccttgaactct  
ttgtcagcagagaagcagggtacgccaaggtgtcctaacgcaaaaaactgggacctggcgtcggccgggtggccta  
cctgtccaaaagctagaccagtagcagctgggtggccccctgctacggatggtagcagccattgcccactgac  
caaaggatgcaggcaagctaaccatgggacagccactagtcattctggcccccatgcagtagaggcactagtca  
aacaacccccgaccgctggctttcaacgcccggatgactactatcaggcctgtctttggacacggaccgggtcc  
agttcggaccgggtggtagccctgaaccgggctacgctgctcccactgctgaggaagggtgcaacacaactgcctt  
gatatcctggccgaagcccacggaacccgacccgacctaacggaccagccgctcccagacgcccgaccacacct  
ggtacacggatggaagcagctcttacaagaggacagcgttaaggcgggagctgcggtgaccaccgagaccga  
ggtaatctgggctaaagccctgcccagccgggacatccgctcagcgggtgaaactgatagcactcaccaggcccta  
aagatggcagaaggtaagaagctaaatgtttatactgatagccgttatgcttttctactgccatcatcagagaaat  
atacagaaggcgtgggtggctcacatcagaaggcaagagatcaaaaaataaagacgagatcttggccctactaaa  
agccctcttctgcccacaaagacttagcataatccattgtccaggacatcaaaagggacacagcggcggaggctaga  
ggcaaccggatggctgaccaagcggccccgaaaggcagccatcacagagactccagacacctctaccctcctcat  
agaaaattcatcaccctctggcggctcaaaaagaaccgcccagcggcagcgaattcagcccagaagaagagg

aaagtctaa

PE2-mid\_RPA70

NLS

Cas9 H840A

Linker A

Linker B

RPA70 ssDBD

Reverse transcriptase

atgaaacggacagccgacggaagcgagttcgagtcaccaaagaagaagcggaaagtcgacaagaagtacagc  
atcggcctggacatcggcaccaactctgtgggctgggcccgtgatcaccgacgagtaacaaggtgccagcaagaaa  
ttcaaggtgctgggcaacaccgaccggcacagcatcaagaagaacctgatcggagccctgctgttcgacagcggc  
gaaacagccgaggccacccggctgaagagaaccgcccagaagaagatacaccagacggaagaaccggatctg  
ctatctgcaagagatctcagcaacgagatggccaaggtggacgacagcttctccacagactggaagagtccttct  
gggtggaagaggataagaagcacgagcggcaccatctcggcaacatcgtggacgaggtggcctaccacgaga  
agtacccaccatctaccctgagaaagaaactgggtggacagcaccgacaaggccgacctgaggctgatctatct  
ggccctggcccatgatcaagttccggggccacttctgatcggggcgacctgaaccccgacaacagcgcagt  
ggacaagctgttcatccagctggtgcagacctacaaccagctgttcgaggaaaacccatcaacgccagcggcgtg  
gacgccaaggccatcctgtctgccagactgagcaagagcagcggctggaaaatctgatcggccagctgccggc  
gagaagaagaatggcctgttcggaaacctgattgccctgagcctgggctgaccccaactcaagagcaacttcg  
acctggccgaggatgccaaactgcagctgagcaaggacacctacgacgacgacctggacaacctgctggccag  
atcggcgaccagtagccgacctgttctggccgcaagaacctgtccgacgccatcctgctgagcgacatcctgag  
agtgaacaccgagatcaccaaggccccctgagcgcctctatgatcaagagatacagcagcaccaccaggacc  
tgacctgtgaaagctctcgtcggcagcagctgacctgagaagtacaaagagatttctcagaccagagcaagaac  
ggctacgccggctacattgacggcggagccagccaggaagagttctacaagttcatcaagccatcctggaaaag  
atggacggcaccgaggaactgctcgtgaagctgaacagagaggacctgctcgggaagcagcggaccttcgacaa  
cggcagcatccccaccagatccacctgggagagctgcacgccattctcggcggcaggaaga ttttaccattcc  
tgaaggacaaccgggaaaagatcgagaagatcctgaccttccgcatcccctactacgtgggccctctggccaggg  
gaaacagcagattcgctggatgaccagaaagagcggaggaaacctacccccctggaacttcgaggaagtgggtg  
gacaagggcgcttccgcccagagcttcatcgagcggatgaccaacttcgataagaacctgcccaacgagaagggtg  
ctgcccagcagcagcctgctgtacgagtacttaccgtgtataacgagctgaccaaagtgaatacgtgaccgagg  
gaatgagaaagcccgccttctgagcggcagcagaaaaaggccatcgtggacctgctgttcaagaccaaccgg  
aaagtgacctgaaagcagctgaaagaggactactcaagaaaatcgagtgcttcgactcctggaaatcctcggcg  
tggaaagatcggttcaacgcctccctgggcacataccacgatctgctgaaattatcaaggacaaggacttctggac  
aatgaggaaaacgaggacattctggaagatatcgtgctgacctgacactgtttgaggacagagagatgatcaggg  
aacggctgaaaacctatgccacctgttcgacgacaaagtgatgaagcagctgaagcggcggagatacaccggct  
ggggcaggctgagccggaagctgatcaacggcatccgggacaagcagtcgggcaagacaatcctggatttctga  
agtccgacggcttcgccaacagaaacttcatgcagctgatccacgacgacagcctgacctttaaagaggacatcca  
gaaagcccaggtgtccggccagggcgatagcctgcacgagcacattgccaatctggccggcagccccgccattaa  
gaagggcatcctgcagacagtgaaaggtgggtggacgagctcgtgaaagtgatggccggcacaagcccgagaac  
atcgtgatcgaaatggccagagagaaccagaccaccagaaggacagagaacagccgcgagagaaatgaa  
gcgatcgaagagggcatcaaagagctgggcagccagatcctgaaagaacaccccgaggaaaacaccagctg  
cagaacgagaagctgtacctgtactacctgcagaatgggcccggatattgacgtggaccaggaactggacatcaac  
cggctgtccgactacgatgtggacgctatcgtgcctcagagcttctgaaggacgactccatcgacaacaagggtgctg  
accagaagcgacaagaaccggggcaagagcgacaacgtgccctccgaagggtcgtgaagaagatgaagaa

ctactggcggcagctgctgaacgccaagctgattaccagagaaagttcgacaatctgaccaaggccgagagagg  
cggcctgagcgaactggataaggccggcttcatcaagagacagctggtgaaacccggcagatcacaagcacg  
tggcacagatcctggactcccggatgaactaagtagcagcagagaatgacaagctgatccgggaagtgaagtga  
tcacctgaagtccaagctggtgctcgattccggaaggattccagtttacaagtgccgagatcaacaactacca  
ccacgcccacgacgcctacctaagcgcctggaacgcccctgatcaaaaagtaccctaagctggaaagcg  
agttcgtgtacggcgactacaagggtgtacgacgtgcggaagatgatcgccaagagcgcagcaggaaatcggcaag  
gctaccgccaagtaacttcttacagcaacatcatgaacttttcaagaccgagattaccctggccaacggcgagatcc  
ggaagcggcctctgatcgagacaaacggcgaacccggggagatcgtgtgggataagggccgggattttgccacc  
gtgctggaaagtgtgtagcatgccccaaagtgaaatcgtgaaaaagaccgaggtgcagacaggcggcttagcaa  
agagtctatcctgccaagaggaacagcgaataagctgatcgccagaaagaaggactgggaccctaagaagtacg  
gctgctgacagccccaccgtggcctattctgtgctgggtggccaaagtggaaaagggcaagtccaagaaact  
gaagagtgtgaaagagctgctggggatcacatcatggaagaagcagcttcgagaagaatcccatcgactttctg  
gaagccaagggctacaaagaagtgaaaaggacctgatcatcaagctgcctaagtactccctgttcgagctggaa  
aacggccggaagagaatgctggcctctgcccggcgaactgcagaagggaaacgaactggccctgccctcaaata  
tgtgaacttctgtacctggccagccactatgagaagctgaagggtcccccgaggataatgagcagaaacagctgt  
ttgtggaacagcacaagcactacctggacgagatcatcgagcagatcagcagatttccaagagagtgatcctggc  
cgacgctaacttgacaaagtgtgctccgctacaacaagcaccgggataagcccatcagagagcaggccgaga  
atatcatccacctgtttaccctgaccaatctgggagcccctgcccctcaagtactttgacaccaccatcgaccgaa  
gaggtacaccagcaccaaagaggtgctggacgccaccctgatccaccagagcatcaccggcctgtacgagacac  
ggatcgacctgtctcagctgggaggtgac **CTGGTGGTTCTCCAAGAAGAAGAGGAAAGTC**  
**GGTAGTTCGGATCT**ggagggagtaacaccaactggaaaacctgtatgaggtcaaatccgagaacctg  
ggccaaggcgacaagccggactactttagtctgtggccacagtgggtgatcttcgcaaagagaactgcatgtacca  
gctgcccgactcaggactgcaataagaaagtgattgatcaacagaatggattgtaccgctgtgagaagtgcgaca  
ccgaatttcccaattcaagtaccgcatgatcctgtcagtaaataattgcagatttcaagagaaatcagtggggtgactgttt  
ccaggagtctgtgaagctatcctggacaaaatgctgcttattctggggaattaaaagacaagaatgaacaggcattt  
gaagaagtttccagaatgccaactccgatctttcatattcagagtcagggtcaaagtgagacctacaacgacgag  
tctcgaattaaggccactgtgatggacgtgaagcccgtggactacagagagatggccgaaggctggatcatgagcat  
caggagaagtgcattgatgtctggaggatctagcggaggatcctctggcagcgcagacaccaggaacaagcagct  
agcaacaccagagagcagtgccggcgcagcagcggcggcagcagcaccctaataatagaagatgagatcggcta  
catgagacctcaaaagagccagatgtttcttaggggtccacatggctgtctgattttcctcaggcctgggcgaaaccg  
ggggcatgggactggcagttcgccaagctcctctgatcatacctctgaaagcaaccttaccctgtccataaaac  
aatacccatgtcacaagaagccagactggggatcaagccccacatacagagactgttgaccagggaatactgg  
taccctgccagtcccctggaacacgcccctgtaccctgtaagaaccagggactaatgattataggcctgtccag  
gatctgagagaagtcaacaagcgggtggaagacatccaccacaaccctgcccacaaccttacaacctttagcggg  
ctcccaccgtcccaccagtgtgactgtgtgattaaaggatgccttttctgcctgagactccaccaccagtcag  
cctctctcgcctttgagtgagagatccagagatgggaatctcaggacaattgacctggaccagactcccacaggg  
ttcaaaaacagtcccaccctgttaatgaggcactgcacagagacctagcagacttccggatccagcaccagactt  
gatcctgtacagtacgtggatgacttactgtgcccacttctgagctagactgccaacaaggactcgggcccctg  
ttacaacccttagggaacctcgggtatcgggcccctggccaagaagcccaaatgtccagaaacagggtcaagtac  
tggggatcttcaaaagaggggtcagagatggctgactgaggccagaaaagagactgtgatggggcagcctactcc  
gaagaccctcgacaactaaggagttcctaggggaaggcaggctctgtcgcctctcatccctgggttgcagaaat  
ggcagccccctgtaccctctcaccaaaccggggactctgttaattggggcccagaccaaaaaggcctatcaa  
gaaatcaagcaagctcttcaactgcccagcccctgggggtgcccagatttgactaagcccttgaactctttgtagcga  
gaagcagggtctacgccaaggtgtcctaacgcaaaaactgggacctggcgtcggccgggtggcctacctgtcaa  
aaagctagaccagtagcagctgggtggccccctgcctacggatggtagcagccattgccgtactgacaaaggat  
gcaggcaagctaaccatgggacagccactagtcattctggcccccatgcagtagaggcactagtcacaacacc

cccgaccgctggccttccaacgcccgatgactcaactatcaggccttgctttggacacggaccgggtccagttcgga  
ccggtgtagccctgaaccggctacgctgctcccactgctgaggaagggtgcaacacaactgccttgatacct  
ggccgaagcccacggaaccggacccgacctaaccggaccagccgctcccagacgcccaccacacctggtacac  
ggatggaagcagctcttacaagagggacagcgttaaggcgggagctgcggtgaccaccgagaccgaggtaatct  
gggctaaagccctgccagccgggacatccgctcagcgggctgaactgatagcactcaccagggcctaaagatgg  
cagaaggtagaagctaaatgtttatactgatagccgttatgctttgctactgccatcatggagaaatatacaga  
aggcgtgggtggctcacatcagaaggcaagagatcaaaaaataaagacgagatctggccctactaaaagccctc  
ttctgccaaaagacttagcataatccattgtccaggacatcaaaagggacacagcggcagggtagaggcaacc  
ggatggctgaccaagcggcccgaaggcagcatcacagagactccagacacctctaccctctcatagaaaatt  
catcacctctggcggctcaaaaagaaccggcagcggcagcgaattcgagcccaagaagaagaggaaagtcta  
a

## hyPE2 = PE2-mid\_Rad51

NLS

Cas9 H840A

Linker A

Linker B

Rad51 ssDBD

Reverse transcriptase

atgaaacggacagccgacggaagcgagttcgagtcacaaagaagaagcggaaagtcgacaagaagtacagc  
atcgccctggacatcggcaccaactctgtggctgggcccgtgatcaccgacgagtaacaggtgccagcaagaaa  
tcaaggtgctgggcaacaccgaccggcacagcatcaagaagaacctgatcggagccctgctgttcgacagcggc  
gaaacagccgaggccaccggctgaagagaaccgccagaagaagatacaccagacggaagaaccggatctg  
ctatctgcaagagatctcagcaacgagatggccaaggtggacgacagcttctccacagactggaagagtccttct  
ggtggaagaggataagaagcacgagcggcaccatctcggcaacatcgtggacgaggtggcctaccacgaga  
agtacccaccatctaccactgagaaagaaactgggtggacagcaccgacaaggccgacctgcggtgatctatct  
ggccctggccacatgatcaagttccggggcacttctgatcagggcgacctgaaccccgacaacagcgcgt  
ggacaagctgttcatccagctggtgcagacctacaaccagctgttcgaggaaaacccatcaacgccagcggcgtg  
gacgccaaggccatctgtctgagactgagcaagagcagcggctggaaaatctgatcggccagctgcccggc  
gagaagaagaatggcctgttcgaaacctgattgccctgagcctggcctgaccccaactcaagagcaacttcg  
acctggccgaggatgccaaactgcagctgagcaaggacacctacgacgacacctggacaacctgctggccag  
atcggcgaccagtagccgacctgttctggccgcaagaacctgtccgacgcatcctgctgagcgacatcctgag  
agtgaacaccgagatcacaaggccccctgagcgctctatgatcaagagatacagcagcaccaccaggacc  
tgacctgtgaaagctctctgctgaggcagcagctgcctgagaagtacaaagagatttctcaccagagcaagaac  
ggctacgcccggctacattgacggcggagccagccaggaagagttctacaagttcatcaagccatcctggaaaag  
atggacggcaccgaggaactgctcgtgaagctgaacagagaggacctgctgagggaagcagcggaccttcgacaa  
cggcagcatccccaccagatccacctgggagagctgcagccattctgcccggcaggaaga ttttaccattcc  
tgaaggacaaccgggaaaagatcgagaagatcctgacctccgcatcccctactacgtggccctctggccaggg  
gaaacagcagattcgctggatgaccagaaagagcaggaaccatccccctggaacttcgaggaagtgtg  
gacaagggcgttccgcccagagcttcatcgagcggatgaccaactcgataagaacctgcccaacgagaaggtg  
ctgccaagcacagcctgctgtacgagtctcaccgtgtataacgagctgaccaaagtgaatacgtgaccgagg  
gaatgagaaaagcccgccttctgagcggcagcagaaaaaggccatcgtggacctgctgttcaagaccaaccgg  
aaagtgacctgaaagcagctgaaagaggactactcaagaaaatcgagtgttcgactccgtggaatctccggcg

tggaagatcgggtcaacgcctccctgggcacataccacgatctgctgaaaattatcaaggacaaggacttctggac  
aatgaggaaaacgaggacattctggaagatatcgtgctgacctgacactgttgaggacagagagatgatcagg  
aacggctgaaaacatgcccacctgttcgacgacaaaagtgatgaagcagctgaagcggcggagatacaccggct  
ggggcaggctgagccggaagctgatcaacggcatccgggacaagcagctccggcaagacaatcctggatttctga  
agtccgacggcttcgccaacagaaacttcatgcagctgatccacgacgacagcctgacctttaaaggagacatcca  
gaaagcccaggtgtccggccagggcgatagcctgcacgagcacattgccaatctggccggcagccccgccatta  
gaagggcatcctgcagacagtgagggtggacgagctcgtgaaagtgatggccggcacaagcccgagaac  
atcgtgatcgaatggccagagagaaccagaccaccagaagggacagaagaacagccgcgagagaaatgaa  
gcgatcgaaggggcatcaaagagctgggcagccagatcctgaaagaacccccgtggaaaacaccagctg  
cagaacgagaagctgtacctgtactacctgcagaatgggctggatgtacgtggaccaggaactggacatcaac  
cggctgtccgactacgatgtggacgctatcgtgcctcagagctttctgaaggacgactccatcgacaacaaggtgctg  
accagaagcgacaagaaccggggcaagagcgacaacgtgccctccgaagaggtcgtgaagaagatgaagaa  
ctactggcggcagctgctgaacgccaagctgattaccagagaaagttcgacaatctgaccaaggccgagagagg  
cggcctgagcgaactggataaggccggcttcatcaagagacagctggtgaaacccggcagatcacaagcagc  
tggcacagatcctggactcccggatgaactaagtagcagcagagaatgacaagctgatccgggaagtgaagtga  
tcacctgaagtccaagctggtgctccgattccggaaggattccagtttacaagtgccgagatcaacaactacca  
ccacgcccacgacgctacctgaacgctgctgggaaccgacctgatcaaaaagtaccctaagctggaaagcg  
agttcgtgtacggcgactacaaggtgtacgacgtgcggaagatgatcgccaagagcgagcaggaaatcggcaag  
gctaccgccaagtacttcttacagcaacatcatgaacttttcaagaccgagattaccctggccaacggcgagatcc  
ggaagcggcctctgatcgagacaaacggcgaaaccggggagatcgtgtggataaggccgggattttgccacc  
gtgctgaaagtgtgagcatgccccagtgaaatctgtgaaaagaccgaggtgcagacaggcggctcagcaa  
agagtctatcctgccaagaggaacagcgaataagctgatcgccagaaagaaggactgggaccttaagaagtacg  
gctgctcagacagccccaccgtggcctattctgtgctggtggccaaagtggaaaaggcaagtccaagaaact  
gaagagtgtgaaagagctgctgggatcaccatcatggaagaagcagcttcgagaagaatcccatcgacttctg  
gaagccaagggtacaaagaagtgaaaaggacctgatcatcaagctgcctaagtactccctgttcgagctggaa  
aacggccggaagagaatgctggcctctgccggcgaactgcagaaggaaacgaactggccctgccctccaaata  
tgtgaactcctgtacctggccagccactatgagaagctgaagggtcccccgaggataatgagcagaaacagctgt  
ttgtggaacagcacaagcactacctggacgagatcatcgagcagatcagcagatttccaagagagtgatcctggc  
cgacgctaacttgacaaaagtgtgctccgctacaacaagcaccgggataagcccatcagagagcaggccgaga  
atatcatccacctgtttaccctgaccaatctgggagcccctgcccctcaagtactttgacaccacctcgaccggaa  
gaggtacaccagcaccaaagaggtgctggacgccacctgatccaccagagcatcaccggcctgtacgagacac  
ggatcgacctgtcagctgggaggtgacTCTGGTGGTTCTCCCAAGAAGAAGAGGAAAGTC  
GGTAGTTCGGATCTgcaatgcagatgcagctgaagcaaatgcagatactcagtggaaagaagaagct  
ttggcccacaaccatttcacggttagagcagctgtggcataaatgccaacgatgtgaagaaattggaagaagctgga  
ttccatactgtgaggctgttcctatgcgccaagaaggagctaataaatattaagggaattagtgaaagcacaagct  
gataaaattctggctgaggcagctaaattagttccaatgggttcaccactgcaactgaattccaccaaaggcggta  
gagatcatacagattactctggctccaaagagcttgacaaactacttcaaTctggaggatctagcggaggatcctct  
ggcagcgagacaccaggaacaagcagctcagcaaacaccagagagcagtgccggcagcagcggcggcagca  
gcaccctaaatatagaagatgagatcggctacatgagacctcaaaagagccagatgtttctctagggctccatgg  
ctgtctgatttctcaggcctggcggaaccgggggcatgggactggcagttcgccaagctcctctgatcatacctct  
gaaagcaacctctacccccgtgtccataaaacaatacccatgtcacaagaagccagactggggatcaagcccca  
catacagagactgttgaccaggaatactggtacctgcccagctcccctggaacacgcccctgctaccgtaaga  
aaccagggactaatgattataggcctgtccaggatctgagagaagtcaacaagcgggtggaagacatccacccca  
ccgtgccaaaccttacaacctctgagcgggctcccaccgtcccaccagtggtacactgtgcttgattaaaggatgc  
cttttctgctgagactccacccaccagctcagcctctctcgcctttgagtgagagatccagagatgggaaatctcag  
gacaattgacctggaccagactcccacagggttcaaaaacagctcccacctgttaatgaggcactgcacagaga

cctagcagacttccggatccagcaccagacttgatcctgctacagtacgtggatgacttactgctggccgacttct  
gagctagactgccaacaaggactcgggacctgttacaaccctagggaaacctcgggtatcgggacctcggccaag  
aaagcccaaatttgccagaaacagggtcaagtatctggggatcttctaaaagaggggtcagagatggctgactgaggc  
cagaaaagagactgtgatggggcagcctactccgaagaccctcgacaactaagggagttcctaggggaaggcag  
gcttctgtcgccttcatccctgggttgcagaaaatggcagccccctgtaccctctaccaaaaccggggactctgttta  
attggggcccagaccaaaaaaggcctatcaagaaatcaagcaagctcttctaactgcccagacctgggggtgccc  
agatttgactaagcccttgaactcttctgacgagaagcagggctacgccaagggtgtcctaacgcaaaaactgg  
gaccttggcgtcggccggtggcctacctgtccaaaaagctagaccagtagcagctgggtggcccccttgcctacgg  
atggtagcagccattgccgtactgacaaaggatgcaggcaagctaaccatgggacagccactagtcattctggccc  
cccatgcagtagaggcactagtcacaacccccgaccgctggcttccaacgcccggatgactcactatcaggc  
cttgccttggacacggaccgggtccagttcggaccgggtggtagccctgaaccgggctacgctgtcccactgctga  
ggaagggctgcaacacaactgccttgatatcctggccgaagcccacggaaccgacccgacctaaccggaccagc  
cgctcccagacgccgaccacactggtacacggatggaagcagctcttcaagagggacagcgtaaggcggga  
gctgcggtgaccaccgagaccgaggtaatctgggctaaagccctgccagccgggacatccgctcagcgggtgaa  
ctgatagcactcaccagggccctaaagatggcagaaggtaagaagctaaatgtttatactgatagccgttatgctttg  
ctactgccatattccatggagaaatatacagaaggcgtgggtggctcacatcagaaggcaagagatcaaaaata  
aagacgagatctggccctactaaaagccctcttctgccaaaagacttagcataatccattgtccaggacatcaaa  
aggacacagcgcgaggctagaggcaaccggatggctgaccaagcggcccgaaggcagccatcacagag  
actccagacacctctacctctcatagaaaattcatcaccctctggcggctcaaaaagaaccgccgacggcagcg  
aattcgagccaagaagaagaggaaagtctaa

## PE2-N\_Rad51

NLS

Cas9 H840A

Linker A

Linker B

Rad51 ssDBD

Reverse transcriptase

atgaaacggacagccgacggaagcaggttcgagtcacaaagaagaagcggaaagtcgcaatgcagatgcag  
ctgaagcaaatgcagatactcagtggaagaagaagccttggcccacaaccatttcacggtagagcagtggtg  
cataaatgccacgatgtgaagaaattggaagaagctggattccatactgtggaggctgttgctatgcgccaaga  
aggagctaataaatattaaggaattagtgaaagcgaagctgataaaattctggctgaggcagctaaattagttcaa  
tgggttaccactgcaactgaattccaccaaaggcggctcagagatcatacagattactactggctccaaagagctg  
acaaactactcaaaTCTGGTGGTTCTCCCAAGAAGAAGAGGAAAGTCGGTAGTTCGG  
ATCTgacaagaagtacagcatcggcctggacatcggcaccaactctgtgggctggccggtgatcaccgacgagt  
acaaggtgccagcaagaaattcaaggtgctgggcaacaccgaccggcacagcatcaagaagaacctgatcgg  
agccctgctgttcgacagcggcgaacagccgaggccaccggctgaagagaaccgccagaagaagatacacc  
agacggaagaaccgatctgctatctgcaagagatctcagcaacgagatggccaagggtggacgacagcttctcc  
acagactggaagagtccttctggtggaagaggataagaagcagcagcggcaccatctcggcaacatcgtgg  
acgaggtggcctaccacgagaagtacccaccatctaccacctgagaaagaaactggtggacagcaccgacaa  
ggccgacctgcggctgatctatctggccctggcccacatgatcaagttccggggccacttctgatcagggcgacct  
gaaccccgacaacagcagcgtggacaagctgttcatccagctggtgcagacctacaaccagctgttcgaggaaaa  
ccccatcaacgccagcggcgtggacgccaaggccatcctgtctgcagactgagcaagagcagacggctggaaa

atctgatcgcccagctgcccggcgagaagaagaatggcctgttcggaaacctgattgccctgagcctgggcctgacc  
cccaactcaagagcaacttcgacctggcggaggatgccaactgcagctgagcaaggacacctacgacgacga  
cctggacaacctgctggcccagatcggcgaccagtacgccgacctgttctggccgccaagaacctgtccgacgcc  
atcctgctgagcgacatcctgagagtgaacaccgagatcaccaaggccccctgagcgctctatgatcaagagat  
acgacgagcaccaccaggacctgacctgctgaaagctctcgctgcggcagcagctgcctgagaagtacaaagag  
atcttctgaccagagcaagaacggctacgccggctacattgacggcggagccagccaggaagagtctacaagtt  
catcaagcccacctggaaaagatggacggcaccgaggaactgctcgtgaagctgaacagagaggacctgctgc  
ggaagcagcggaccttcgacaacggcagcatccccaccagatccacctgggagagctgcacgccattctgcgg  
cggcaggaagatcttaccattcctgaaggacaaccgggaaaagatcgagaagatcctgacctccgcatccccta  
ctacgtggccctctggccaggggaaacagcagattcgctggatgaccagaaagagcagaggaaacctacccc  
cctggaacttcgaggaagtggaggacaaggcgcttcgcccagagcttcatcgagcggatgaccaacttcgataa  
gaacctgccaacgagaaggtgctgccaagcacagcctgctgtacgagtacttaccgtgtataacgagctgacc  
aaagtgaatacgtgaccgaggaatgagaaagcccgcttctgagcggcgagcagaaaaaggccatcgtgg  
acctgctgtcaagaccaaccgaaagtaccgtgaagcagctgaaagaggactactcaagaaaatcgagtgctt  
cgactccgtggaaatctccggcgtggaagatcggttcaacgcctccctgggcacataccacgatctgctgaaaattat  
caaggacaaggacttctggacaatgaggaaaacgaggacattctggaagatatcgtgctgacctgacactgtttg  
aggacagagagatgatcgaggaacggctgaaaacctatgccacctgttcgacgacaaaagtgatgaagcagctg  
aagcggcggagatacaccggctggggcaggctgagccggaagctgatcaacggcatccgggacaagcagtcgg  
gcaagacaatcctggattcctgaagtccgacggcttcgccaacagaaaacttcatgcagctgatccacgacgacagc  
ctgaccttaagaggacatccagaaagcccagggtgccggccagggcgatagcctgcacgagcacattgccaat  
ctggccggcagccccgccattaagaagggcatcctgcagacagtgaaggtggaggagctcgtgaaagtgatg  
ggccggcacaagcccgagaacatcgtgatcgaatggccagagagaaccagaccaccagaaggggacagaa  
gaacagccgcgagagaatgaagcggatcgaagagggcatcaaagagctgggcagccagatcctgaaagaaca  
ccccgtggaaaacaccagctgcagaacgagaagctgtacctgtactacctgcagaatgggcgggatagtacgtg  
gaccaggaactggacatcaaccggctgtccgactacgatgtggacgctatcgtgcctcagagcttctgaaggacga  
ctccatcgacaacaaggtgctgaccagaagcgacaagaaccggggcaagagcgacaacgtgccctccgaaga  
ggctgtgaagaagatgaagaactactggcggcagctgctgaacgccaagctgattaccagagaaagttcgacaa  
tctgaccaaggccgagagaggcggcctgagcgaactggataaggccggcttcatcaagagacagctgggtgaaa  
cccggcagatcacaagcacgtggcacagatcctggactcccggatgaacactaagtacgacgagaatgacaag  
ctgatccgggaagtgaagtgatcacctgaagtccaagctggtgtccgatttcggaaggattccagtttacaag  
tgcgcgagatcaacaactaccaccacgcccacgacgcctacctgaacgcccgtcgtgggaaccgcccctgatcaaaa  
agtaccctaagctggaaagcgagttcgtgtacggcgactacaaggtgtacgacgtgcggaagatgatcgccaaga  
gagcagcaggaatcggcaaggctaccgccaagtacttcttacagcaacatcatgaacttttcaagaccgagatta  
ccctggccaacggcgagatccggaagcggcctctgatcgagacaaaacggcgaaaccggggagatcgtgtgggat  
aagggccgggattttgccaccgtcggaaagtgtgagcatgccccagtgaatatcgtgaaaaagaccgaggtg  
cagacaggcggctcagcaaaagagtctatcctgcccagaggaacagcgataagctgatcgccagaaagaagg  
actgggaccttaagaagtacggcggcttcgacagcccacctggcctattctgtgctgggtggccaaagtggaa  
aagggaagtccaagaaactgaagagtgtgaaagagctgctggggatcacatcatggaaagaagcagcttoga  
gaagaatcccatcgacttctggaagccaagggtacaaagaagtgaaaaaggacctgatcatcaagctgcctaa  
gtactccctgttcgagctggaaaacggcgggaagagaatgctggcctctgcccggcgaactgcagaagggaaacga  
actggccctgccctccaaatatgtgaactcctgtacctggccagccactatgagaagtgaagggctccccgagg  
ataatgagcagaaacagctgtttgtggaacagcacaagcactacctggacgagatcatcgagcagatcagcgagtt  
ctccaagagagtgatcctggccgacgctaacttggaacaaagtgtgtccgcctacaacaagcaccgggataagccc  
atcagagagcaggccgagaatatcatccacctgtttaccctgaccaatctgggagcccctgccccttcaagtactttg  
acaccacatcgaccggaagaggtacaccagcaccaaagaggtgctggacgccacctgatccaccagagcat  
caccggcctgtacgagacacggatcgacctgtctcagctgggaggtgactctggaggatctagcggaggatcctctg



gcagcgagacaccaggaacaagcgagtcagcaacaccagagagcagtgggcggcagcagcggcggcagcag  
cacctaataatagaagatgagatcggtacatgagacctcaaaagagccagatgtttcttagggccacatggct  
gtctgattttctcaggcctgggcggaaacgggggcatgggactggcagttcgccaagctcctctgatcatacctctg  
aaagcaaccttaccctgtccataaaacaataccctatgtcacaagaagccagactggggatcaagcccac  
atacagagactgttgaccaggggaatactggctaccctgccagtccccctggaacacgcccctgctacccttaagaa  
accagggactaatgattataggcctgtccaggatctgagagaagtcaacaagcgggtggaagacatccaccccac  
cgtgcccaaccttacaacctctgagcgggctcccaccgtcccaccagtggtaactgtgcttgattaaaggatgcc  
ttttctgcctgagactccaccccaccagtcagcctctctgcctttgagtggagagatccagagatgggaatctcagg  
acaattgacctggaccagactcccacagggtttcaaaaacagtcccaccctgttaatgaggcactgcacagagacc  
tagcagacttccggatccagcaccagactgtatcctgctacagtacgtggatgacttactgctggccgcccactctga  
gctagactgccaacaaggtactcgggcccgtgttacaaccctagggaacctcgggtatcgggcccctcggccaagaa  
agcccaaattgccaagaacaggcaagtatctggggtatcttcaaaagagggtcagagatggctgactgaggcca  
gaaaagagactgtgatggggcagcctactccgaagaccctcgacaactaaggaggtcctagggaaggcaggc  
ttctgtgcctctcatccctgggttgagaaatggcagccccctgtacccttcaccaaacggggactctgttaatt  
ggggcccagaccaaaaaaggcctatcaagaaatcaagcaagctcttctaactgcccagcccctggggtgcccag  
attgactaagcccttgaactctttgcgacgagaagcagggctacgccaagggtcctaacgcaaaaactgggac  
cttgcgctggccggtggcctacctgtcaaaaagctagaccagtagcagctgggtggccccctgctacggatg  
gtagcagccattgccgtactgacaaaggatgcaggcaagctaaccatgggacagccactagctattctggcccccc  
atgcagtagaggcactagtcaaaaaacccccgaccgtggctttcaacgcccggatgactactatcaggccttg  
ctttggacacggaccgggtccagttcggaccgggtggtagccctgaaccggctacgctgctcccactgcccaggga  
agggctgcaacacaactgcttgatacctggccgaagcccacggaaccgacccgacctaacggaccagccgct  
cccagacgcccaccacacctggtagcggatggaagcagctcttcaagagggacagcgtaaggcgggagctg  
cggtagaccaccgagaccgaggtaatctgggctaaagccctgccagccgggacatccgctcagcgggctgaactga  
tagcactcaccaggccctaaagatggcagaaggtgaagaagctaaatgtttatactgatagccgttatgcttttact  
gcccataatcattggagaaatatacagaaggcgtgggtggctcacatcagaaggcaagagatcaaaaaataaaga  
cgagactctggccctactaaaagccctcttctgccaaaagacttagcataatccattgtccaggacatcaaaaagg  
acacagcggcaggctagaggcaaccggatggctgaccaagcggcccgaaggcagccatcacagagactcc  
agacaccttaccctctcatagaaaattcatccctctggcggctcaaaaagaaccgcccagcggcagcgaattc  
gagcccaagaagaagaggaaagtctaa

## PE2-C\_Rad51

NLS

Cas9 H840A

Linker A

Linker B

Rad51 ssDBD

Reverse transcriptase

atgaaacggacagccgacggaagcgagttcgagtcacaaagaagaagcggaaagtcgacaagaagtacagc  
atcggcctggacatcggcaccaactctgtgggctgggcccgtgatcaccgacgagtacaaggtgccagcaagaaa  
ttcaaggtgctgggcaacaccgaccggcacagcatcaagaagaacctgatcggagcccctgctgttcgacagcggc  
gaaacagccgaggccaccggctgaagagaaccgccagaagaagatacaccagacggaagaaccggatctg  
ctatctgcaagagatctcagcaacgagatggccaaggtggacgacagcttctccacagactggaagagtccttct  
gggtggaagaggataagaagcagcagcggcaccatctcggcaacatcgtggacgaggtggcctaccacgaga  
agtaccccaccatctaccacctgagaaagaactgggtggacagcaccgacaaggccgacctgcggctgatctatct

ggccctggccacatgatcaagttccggggccacttctgatcgagggcgacctgaaccccgacaacagcgacgt  
ggacaagctgttcatccagctggtgcagacctacaaccagctgttcgaggaaaaccccatcaacgccagcggcgtg  
gacgccaaggccatcctgtctgccagactgagcaagagcagacggctggaaaatctgatcgccagctgccggc  
gagaagaagaatggcctgttcggaaacctgattgccctgagcctgggctgaccccaactcaagagcaacttcg  
acctggccgaggatgccaaactgcagctgagcaaggacacctacgacgacgacctggacaacctgctggccag  
atcggcgaccagtacgccgacctgttctggccgcaagaacctgtccgacgccatcctgctgagcgacatcctgag  
agtgaacaccgagatcaccaaggccccctgagcgcctctatgatcaagagatacgcgagcaccaccaggacc  
tgacctgctgaaagctctcgtgcggcagcagctgcctgagaagtacaaagagattttctcgaccagagcaagaac  
ggctacgccggctacattgacggcggagccagccaggaagagttctacaagttcatcaagccatcctggaaaag  
atggacggcaccgaggaactgctcgtgaagctgaacagagaggacctgctgcggaagcagcggaccttcgacaa  
cggcagcatccccaccagatccacctgggagagctgcacgccattctgcggcggcaggaaga ttttaccattcc  
tgaaggacaaccgggaaaagatcgagaagatcctgacctccgcatcccctactacgtgggccctctggccaggg  
gaaacagcagattcgctggatgaccagaaagagcagaggaaccatcacccctggaacttcgaggaagtggg  
gacaagggcgcttccgcccagagcttcatcgagcggatgaccaacttcgataagaacctgcccaacgagaaggtg  
ctgcccaagcacagcctgctgtacgagtacttaccgtgtataacgagctgaccaaagtgaatacgtgaccgagg  
gaatgagaaaagcccgccttctgagcggcgagcagaaaaaggccatcgtggacctgctgttcaagaccaaccgg  
aaagtgacctgaaagcagctgaaagaggactactcaagaaaatcgagtgcttcgactccgtggaatctccggcg  
tggagatcgggtcaacgcctccctgggcacataccacgatctgctgaaaattatcaaggacaaggacttctggac  
aatgaggaaaacgaggacattctggaagatatcgtgctgacctgacactgtttgaggacagagagatgatcgagg  
aacggtgaaaacctatgcccacctgttcgacgacaaaagtgatgaagcagctgaagcggcggagatacaccggct  
ggggcaggctgagccggaagctgatcaacggcatccgggacaagcagctccggcaagacaatcctggatttctga  
agtccgacggcttcgccaacagaaacttcatgcagctgatccacgacgacagcctgacctttaaaggagacatcca  
gaaagcccagggtgtccggccagggcgatagcctgcacgagcacattgccaatctggccggcagccccgccattaa  
gaagggcatcctgcagacagtgaaaggtggtggacgagctcgtgaaagtgatggccggcacaagcccgagaac  
atcgtgatcgaaatggccagagagaaccagaccaccagaagggacagaagaacagccgagagagaatgaa  
gcgatcgaaagggcatcaaagagctgggcagccagatcctgaaagaacaccccgtgaaaaacaccagctg  
cagaacgagaagctgtacctgtactacctgcagaatgggcccgatatgtacgtggaccaggaactggacatcaac  
cggctgtccgactacgatgtggacgctatcgtgcctcagagctttctgaaggacgactccatcgacaacaaggtgctg  
accagaagcgacaagaaccggggcaagagcgacaacgtgccctccgaagaggtcgtgaagaagatgaagaa  
ctactggcggcagctgctgaacccaagctgattaccagagaaaagttcgacaatctgaccaaggccgagagagg  
cggcctgagcgaactggataaggccggcttcatcaagagacagctggtggaaacccggcagatcacaagcagc  
tggcacagatcctggactcccggatgaactaagtacgacgagaatgacaagctgatccgggaagtgaagtg  
tcacctgaagtccaagctggtgtccgatttccggaaggatttccagtttacaagtgcgcgagatcaacaactacca  
ccacgcccacgacgcctacctgaacgccgtcgtgggaaccgccctgatcaaaaagtaccctaagctggaaagcg  
agttcgtgtacggcgactacaaggtgtacgacgtgcggaagatgatcgccaagagcagcaggaatcggcaag  
gctaccgccaagtacttcttacagcaacatcatgaacttttcaagaccgagattaccctggccaacggcgagatcc  
ggaagcggcctctgatcgagacaaacggcgaaaccggggagatcgtgtgggataagggccgggattttgccacc  
gtgcggaaagtgtgagcatgccccaaagtgaatatcgtgaaaaagaccgaggtgcagacaggcggcttcagcaa  
agagtctatcctgcccaagaggaacagcgataagctgatcgccagaaagaaggactgggaccttaagaagtacg

gcggcttcgacagccccaccgtggcctattctgtgctgggtgggcccacaaagtggaaaagggcaagtccaagaaact  
gaagagtgtgaaagagctgctgggatcacatcatggaaagaagcagcttcgagaagaatcccatcgactttctg  
gaagccaagggctacaaagaagtgaaaaggacctgatcatcaagctgcctaagtactccctgttcgagctggaa  
aacggccggaagagaatgctggcctctgccggcgaactgcagaagggaaacgaactggccctgccctcaaata  
tgtgaacttctgtacctggccagccactatgagaagctgaagggctccccgaggataatgagcagaaacagctgt  
ttgtggaacagcacaagcactacctggacgagatcatcgagcagatcagcagatttccaagagagtgatcctggc  
cgacgctaacttgacaaaagtgtctgccgctacaacaagcaccgggataagcccatcagagagcaggccgaga  
atatcatccacctgtttaccctgaccaatctgggagccccctgccgcttcaagtactttgacaccaccatcgaccgga  
gaggtacaccagcaccaaagaggtgctggacgccaccctgatccaccagagcatcaccggcctgtacgagacac  
ggatcgacctgtctcagctgggaggtgactctggaggatctagcggaggatcctctggcagcagacaccaggaac  
aagcagctcagcaacaccagagagcagtgccggcagcagcggcggcagcagcaccctaaatatagaagatga  
gtatcggctacatgagacctcaaaagagccagatgtttctctagggccacatggctgtctgattttctcaggcctggg  
cggaaaccgggggcatgggactggcagttcgcaagctcctctgatcatacctctgaaagcaacctctacccccgtg  
tcataaacaatacccatgtcacaagaagccagactggggatcaagccccacatacagagactgttgaccag  
ggaatactggtaccctgccagtccccctggaacacgccccctgctaccgftaagaaccagggaactaatgattatag  
gcctgtccaggatctgagagaagtcaacaagcgggtggaagacatccaccaccctgcccaccccttacaacct  
ctgagcgggctcccaccgtcccaccagtgtacactgtgcttgatttaaaggatgccttttctgctgagactccacce  
caccagtacgctctcttcgctttgagtggagagatccagagatgggaatctcaggacaattgacctggaccagact  
cccacagggttcaaaaacagctcccaccctgttfaatgaggcactgcacagagacctagcagacttccggatccagc  
accagactgatcctgctacagtacgtggatgactactgtgcccacttctgagctagactgccaacaaggtac  
tcgggccctgttcaaacctagggaaacctcgggtatcgggctcggccaagaaagcccaaattgcccagaaaca  
ggtaagtatctgggtatcttctaaaagagggtcagagatggctgactgaggccagaaaagagactgtgatgggg  
cagcctactccgaagaccctcgcacaactaaggagttcctaggggaaggcaggcttctgctgcctcttcatccctggg  
ttgcagaaatggcagccccctgtaccctctcaccaaaccggggactctgttfaatggggcccagaccaaaaa  
ggcctatcaagaaatcaagcaagctcttctaactgccccagccctggggtgcccagatttgactaagcccttgaactct  
ttgtcagcagagaagcagggctacgcaaagggtctctaacgcaaaaaactgggacctggcgtcggccgggtgacct  
cctgtccaaaagctagaccagtagcagctgggtggcccccttgctacggatggtagcagccattgccgtactga  
caaaggatgcaggcaagctaaccatgggacagccactagtcattctggccccccatgcagtagaggcactagtca  
aacaacccccgaccgtggctttcaacgcccggatgactactatcaggcctgttttgacacggaccgggtcc  
agttcggaccgggtgtagccctgaaccggctacgctgctcccactgctgaggaagggctgcaacacaactgcctt  
gatatcctggccgaagcccacggaacccgacccgacctaacggaccagccgctcccagacgcccaccacacct  
ggtacacggatggaagcagctcttacaagagggacagcgttaaggcgggagctgagggtgaccaccgagaccga  
ggtaatctgggctaaagccctgccagccgggacatccgctcagcgggtgaaactgatagcactcaccaggcccta  
aagatggcagaaggtgaagaagctaaatgtttatactgatagccgttatgcttttctactgccataccatggagaaat  
atacagaaggcgtgggtggctcacatcagaaggcaagagatcaaaaataaagacgagatcttgccctactaaa  
agccctctttctgcccaaaagacttagcataatccattgtccaggacatcaaaagggacacagcggcaggctaga  
ggcaaccggatggctgaccaagcggcccgaaggcagccatcacagagactccagacacctctaccctctcat  
agaaaattcatcaccctctggcggctcaaaaagaaccgcccagcggcagcgaattcagTCTGGTGGTTCT  
CCCAAGAAGAAGAGGAAAGTCCGGTAGTCCGGATC gcaatgcagatgcagcttgaagca

aatgcagatacttcagtgaagaagaaagctttggcccacaacccatttcacggttagagcagtggtgcataaatgc  
caacgatgtgaagaaattggaagaagctggattccatactgtggaggctgttcctatgcgccaagaaggagcta  
ataaatattaaggaattagtgaagccaaagctgataaaattctggctgaggcagctaaattagttccaatgggttca  
ccactgcaactgaattccaccaaggcggtcagagatcatacagattactactggctccaaagagcttgacaaacta  
ctcaaccaagaagaagaggaaagtctaa
